# Supplementary material for: MG-MLST: Characterizing the Microbiome at the Strain Level in Metagenomic Data
Source: Microorganisms. 2020 May 8;8(5):684. doi: 10.3390/microorganisms8050684 (PMC7284976; doi:10.3390/microorganisms8050684)
Supplement: Supplementary file 1 [file microorganisms-08-00684-s001.zip]

Archive with 6 entries (6 files):
- MLSTPaper-SupplementaryFigureS1.pdf
- MLSTPaper-SupplementaryFigureS2.pdf
- MLSTPaper-SupplementaryTableS1_final.pdf
- MLSTPaper-SupplementaryTableS2_final.pdf
- MLSTPaper-SupplementaryTableS3_final.pdf
- MLSTPaper-SupplementaryTableS4_final.pdf
