# Supplementary material for: MG-MLST: Characterizing the Microbiome at the Strain Level in Metagenomic Data
Source: Microorganisms. 2020 May 8;8(5):684. doi: 10.3390/microorganisms8050684 (PMC7284976; doi:10.3390/microorganisms8050684)
Supplement: Supplementary file 1 [file microorganisms-08-00684-s001.zip › MLSTPaper-SupplementaryFigureS2.pdf]

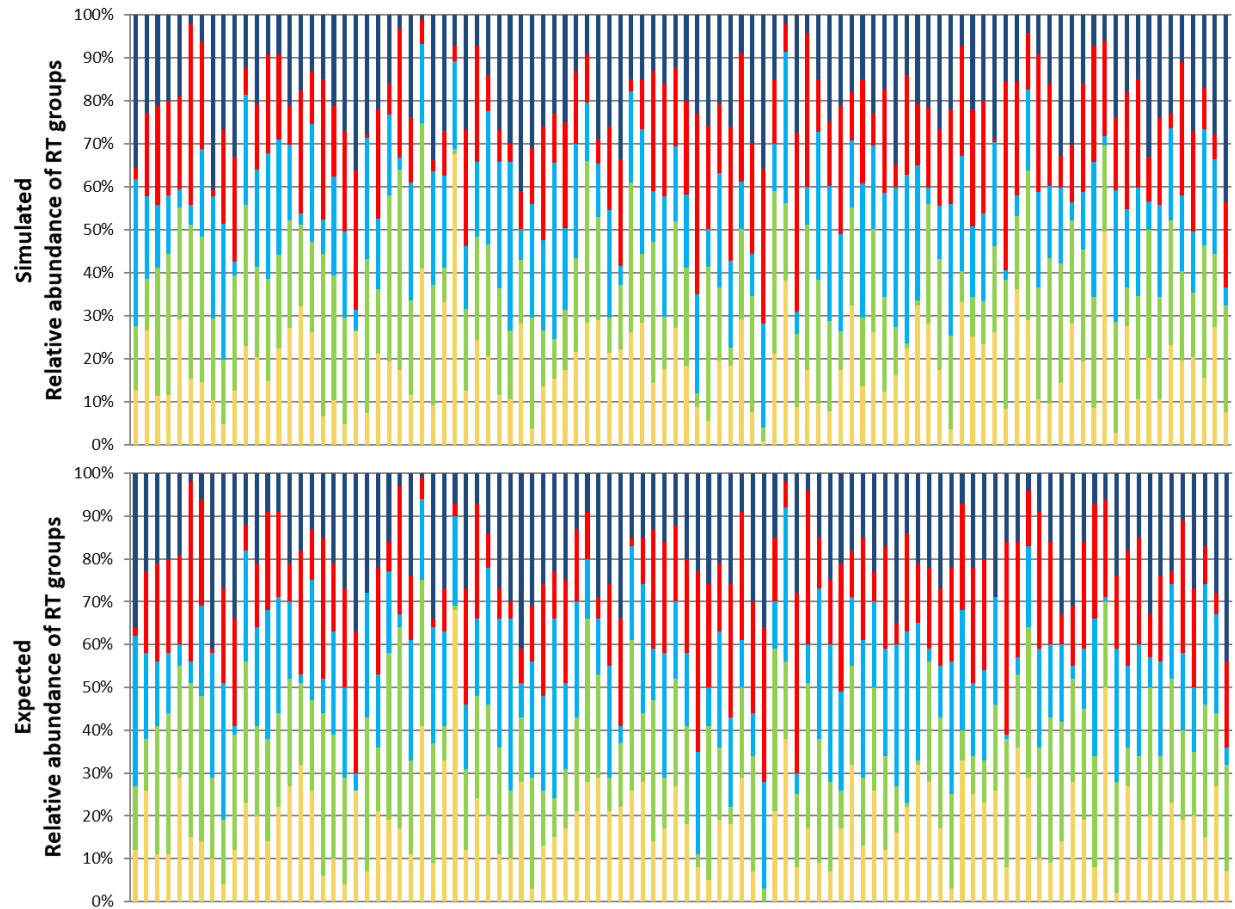

Figure S2. The strain composition predicted by STRUCTURE is highly consistent with the expected *P. acnes* populations based on 100 random simulated datasets.

RT1 RT2/6 RT3 RT4/5 RT8
