# Supplementary material for: MG-MLST: Characterizing the Microbiome at the Strain Level in Metagenomic Data
Source: Microorganisms. 2020 May 8;8(5):684. doi: 10.3390/microorganisms8050684 (PMC7284976; doi:10.3390/microorganisms8050684)
Supplement: Supplementary file 1 [file microorganisms-08-00684-s001.zip › MLSTPaper-SupplementaryTableS1_final.pdf]

**Table S1. *P. acnes* strains included in the "Learning Sample" set.**

| <b>Strain</b> | <b>Aarhus</b> | <b>Belfast</b> | <b>Aarhus-Belfast</b> |
|---------------|---------------|----------------|-----------------------|
| 266           | RT1           | RT1            | RT1                   |
| 6609          | Not Included  | TIB3           | Not Included          |
| ATCC11828     | RT2/6         | RT2/6          | RT2/6                 |
| HL074PA1      | Not Included  | RT4/5          | Not Included          |
| HL001PA1      | RT2/6         | RT2/6          | RT2/6                 |
| HL002PA1      | Not Included  | RT3            | Not Included          |
| HL002PA2      | RT1           | RT1            | RT1                   |
| HL002PA3      | RT1           | RT1            | RT1                   |
| HL005PA1      | RT4/5         | RT4/5          | RT4/5                 |
| HL005PA2      | RT1           | RT1            | RT1                   |
| HL005PA3      | RT1           | RT1            | RT1                   |
| HL005PA4      | RT3           | RT3            | RT3                   |
| HL007PA1      | RT4/5         | RT4/5          | RT4/5                 |
| HL013PA1      | Not Included  | RT3            | Not Included          |
| HL013PA2      | RT1           | RT1            | RT1                   |
| HL020PA1      | RT1           | RT1            | RT1                   |
| HL025PA1      | Not Included  | Not Included   | HL025PA1-RT1          |
| HL025PA2      | RT3           | RT3            | RT3                   |
| HL027PA1      | RT3           | RT3            | RT3                   |
| HL027PA2      | RT1           | RT1            | RT1                   |
| HL030PA1      | TIB3          | TIB3           | TIB3                  |
| HL030PA2      | RT3           | RT3            | RT3                   |
| HL036PA3      | RT1           | RT1            | RT1                   |
| HL037PA1      | RT3           | RT3            | RT3                   |
| HL038PA1      | RT4/5         | RT4/5          | RT4/5                 |
| HL042PA3      | RT2/6         | RT2/6          | RT2/6                 |
| HL043PA1      | RT4/5         | RT4/5          | RT4/5                 |
| HL043PA2      | RT4/5         | RT4/5          | RT4/5                 |
| HL045PA1      | RT4/5         | RT4/5          | RT4/5                 |
| HL046PA1      | RT3           | RT3            | RT3                   |
| HL046PA2      | RT1           | RT1            | RT1                   |
| HL050PA1      | RT3           | RT3            | RT3                   |
| HL050PA3      | RT3           | RT3            | RT3                   |
| HL053PA1      | RT4/5         | RT4/5          | RT4/5                 |
| HL053PA2      | RT8           | RT8            | RT8                   |
| HL056PA1      | RT4/5         | RT4/5          | RT4/5                 |
| HL060PA1      | RT2/6         | RT2/6          | RT2/6                 |
| HL063PA1      | RT1           | RT1            | RT1                   |
| HL063PA2      | RT3           | RT3            | RT3                   |
| HL067PA1      | RT3           | RT3            | RT3                   |
| HL074PA1      | RT4/5         | Not Included   | RT4/5                 |
| HL082PA1      | RT8           | RT8            | RT8                   |
| HL082PA2      | RT2/6         | RT2/6          | RT2/6                 |
| HL083PA2      | RT3           | RT3            | RT3                   |
| HL086PA1      | RT8           | RT8            | RT8                   |
| HL087PA1      | RT3           | RT3            | RT3                   |
| HL087PA2      | RT1           | RT1            | RT1                   |
| HL087PA3      | RT3           | RT3            | RT3                   |
| HL092PA1      | RT8           | RT8            | RT8                   |
| HL096PA1      | RT4/5         | RT4/5          | RT4/5                 |
| HL096PA2      | RT4/5         | RT4/5          | RT4/5                 |
| HL096PA3      | RT1           | RT1            | RT1                   |
| HL097PA1      | Not Included  | Not Included   | TIC                   |

|           |              |              |              |
|-----------|--------------|--------------|--------------|
| HL099PA1  | RT4/5        | RT4/5        | RT4/5        |
| HL100PA1  | RT1          | RT1          | RT1          |
| HL103PA1  | RT2/6        | RT2/6        | RT2/6        |
| HL106PA1  | RT2/6        | Not Included | Not Included |
| HL110PA1  | RT8          | RT8          | RT8          |
| HL110PA2  | RT8          | RT8          | RT8          |
| HL110PA3  | RT2/6        | RT2/6        | RT2/6        |
| HL110PA4  | RT2/6        | RT2/6        | RT2/6        |
| HL202PA1  | RT2/6        | RT2/6        | RT2/6        |
| J139      | RT2/6        | RT2/6        | RT2/6        |
| J165      | RT1          | RT1          | RT1          |
| KPA171202 | TIB3         | TIB3         | TIB3         |
| P.acn17   | RT3          | RT3          | RT3          |
| P.acn31   | RT3          | RT3          | RT3          |
| P.acn33   | Not Included | RT3          | Not Included |
| PRP-38    | Not Included | Not Included | TIC          |
| SK137     | Not Included | Not Included | SK-RT1       |
| SK182     | Not Included | Not Included | SK-RT1       |
| SK187     | RT3          | Not Included | SK187-RT3    |

\*Strains not included in the "Learning Sample" set for a particular MLST scheme are labeled "Not Included".
