# Supplementary material for: MG-MLST: Characterizing the Microbiome at the Strain Level in Metagenomic Data
Source: Microorganisms. 2020 May 8;8(5):684. doi: 10.3390/microorganisms8050684 (PMC7284976; doi:10.3390/microorganisms8050684)
Supplement: Supplementary file 1 [file microorganisms-08-00684-s001.zip › MLSTPaper-SupplementaryTableS2_final.pdf]

**Table S2. Expected RT group composition of each simulated community.**

| Relative abundance of each RT group |           |      |       |      |       |      |
|-------------------------------------|-----------|------|-------|------|-------|------|
| Set                                 | Community | RT1  | RT2/6 | RT3  | RT4/5 | RT8  |
| A                                   | A1        | 1    | 0     | 0    | 0     | 0    |
| A                                   | A2        | 1    | 0     | 0    | 0     | 0    |
| A                                   | A3        | 1    | 0     | 0    | 0     | 0    |
| A                                   | A4        | 0    | 1     | 0    | 0     | 0    |
| A                                   | A5        | 0    | 1     | 0    | 0     | 0    |
| A                                   | A6        | 0    | 1     | 0    | 0     | 0    |
| A                                   | A7        | 0    | 0     | 1    | 0     | 0    |
| A                                   | A8        | 0    | 0     | 0    | 1     | 0    |
| A                                   | A9        | 0    | 0     | 0    | 1     | 0    |
| A                                   | A10       | 0    | 0     | 0    | 1     | 0    |
| A                                   | A11       | 0    | 0     | 0    | 0     | 1    |
| B                                   | B1        | 0.12 | 0.15  | 0.35 | 0.02  | 0.36 |
| B                                   | B2        | 0.26 | 0.12  | 0.2  | 0.19  | 0.23 |
| B                                   | B3        | 0.11 | 0.3   | 0.15 | 0.23  | 0.21 |
| B                                   | B4        | 0.11 | 0.33  | 0.14 | 0.22  | 0.2  |
| B                                   | B5        | 0.29 | 0.26  | 0.05 | 0.21  | 0.19 |
| B                                   | B6        | 0.15 | 0.36  | 0.05 | 0.42  | 0.02 |
| B                                   | B7        | 0.14 | 0.34  | 0.21 | 0.25  | 0.06 |
| B                                   | B8        | 0.1  | 0.19  | 0.29 | 0.01  | 0.41 |
| B                                   | B9        | 0.04 | 0.15  | 0.32 | 0.22  | 0.27 |
| B                                   | B10       | 0.12 | 0.27  | 0.02 | 0.25  | 0.34 |
| B                                   | B11       | 0.23 | 0.33  | 0.26 | 0.06  | 0.12 |
| B                                   | B12       | 0.2  | 0.21  | 0.23 | 0.15  | 0.21 |
| B                                   | B13       | 0.14 | 0.24  | 0.3  | 0.23  | 0.09 |
| B                                   | B14       | 0.22 | 0.22  | 0.27 | 0.2   | 0.09 |
| B                                   | B15       | 0.27 | 0.25  | 0.18 | 0.09  | 0.21 |
| B                                   | B16       | 0.32 | 0.19  | 0.02 | 0.29  | 0.18 |
| B                                   | B17       | 0.26 | 0.21  | 0.28 | 0.12  | 0.13 |
| B                                   | B18       | 0.06 | 0.38  | 0.08 | 0.33  | 0.15 |
| B                                   | B19       | 0.1  | 0.29  | 0.24 | 0.16  | 0.21 |
| B                                   | B20       | 0.04 | 0.25  | 0.21 | 0.23  | 0.27 |
| B                                   | B21       | 0.26 | 0     | 0.04 | 0.33  | 0.37 |
| B                                   | B22       | 0.07 | 0.36  | 0.29 | 0     | 0.28 |
| B                                   | B23       | 0.21 | 0.15  | 0.17 | 0.25  | 0.22 |
| B                                   | B24       | 0.19 | 0.39  | 0.19 | 0.07  | 0.16 |
| B                                   | B25       | 0.17 | 0.47  | 0.03 | 0.3   | 0.03 |
| B                                   | B26       | 0.11 | 0.22  | 0.28 | 0.15  | 0.24 |
| B                                   | B27       | 0.41 | 0.34  | 0.19 | 0.05  | 0.01 |
| B                                   | B28       | 0.09 | 0.28  | 0.27 | 0.02  | 0.34 |
| B                                   | B29       | 0.33 | 0.08  | 0.22 | 0.1   | 0.27 |
| B                                   | B30       | 0.68 | 0.01  | 0.21 | 0.03  | 0.07 |
| B                                   | B31       | 0.12 | 0.19  | 0.15 | 0.27  | 0.27 |
| B                                   | B32       | 0.24 | 0.24  | 0.18 | 0.27  | 0.07 |
| B                                   | B33       | 0.2  | 0.26  | 0.32 | 0.08  | 0.14 |
| B                                   | B34       | 0.11 | 0.25  | 0.3  | 0.07  | 0.27 |
| B                                   | B35       | 0.1  | 0.16  | 0.4  | 0.04  | 0.3  |
| B                                   | B36       | 0.28 | 0.15  | 0.08 | 0.08  | 0.41 |
| B                                   | B37       | 0.03 | 0.26  | 0.27 | 0.13  | 0.31 |
| B                                   | B38       | 0.13 | 0.13  | 0.22 | 0.26  | 0.26 |
| B                                   | B39       | 0.15 | 0.09  | 0.42 | 0.11  | 0.23 |
| B                                   | B40       | 0.17 | 0.14  | 0.2  | 0.24  | 0.25 |
| B                                   | B41       | 0.21 | 0.22  | 0.27 | 0.17  | 0.13 |

|   |     |      |      |      |      |      |
|---|-----|------|------|------|------|------|
| B | B42 | 0.28 | 0.38 | 0.14 | 0.11 | 0.09 |
| B | B43 | 0.29 | 0.24 | 0.13 | 0.05 | 0.29 |
| B | B44 | 0.21 | 0.08 | 0.26 | 0.19 | 0.26 |
| B | B45 | 0.22 | 0.15 | 0.04 | 0.25 | 0.34 |
| B | B46 | 0.26 | 0.35 | 0.22 | 0.02 | 0.15 |
| B | B47 | 0.28 | 0.16 | 0.3  | 0.11 | 0.15 |
| B | B48 | 0.14 | 0.33 | 0.12 | 0.28 | 0.13 |
| B | B49 | 0.17 | 0.12 | 0.29 | 0.26 | 0.16 |
| B | B50 | 0.27 | 0.25 | 0.18 | 0.18 | 0.12 |
| B | B51 | 0.18 | 0.23 | 0.17 | 0.22 | 0.2  |
| B | B52 | 0.08 | 0.03 | 0.24 | 0.42 | 0.23 |
| B | B53 | 0.05 | 0.36 | 0.09 | 0.24 | 0.26 |
| B | B54 | 0.19 | 0.17 | 0.27 | 0.16 | 0.21 |
| B | B55 | 0.18 | 0.04 | 0.21 | 0.31 | 0.26 |
| B | B56 | 0.29 | 0.21 | 0.11 | 0.3  | 0.09 |
| B | B57 | 0.07 | 0.27 | 0.1  | 0.26 | 0.3  |
| B | B58 | 0    | 0.03 | 0.25 | 0.36 | 0.36 |
| B | B59 | 0.21 | 0.38 | 0.11 | 0.15 | 0.15 |
| B | B60 | 0.38 | 0.18 | 0.36 | 0.06 | 0.02 |
| B | B61 | 0.08 | 0.17 | 0.05 | 0.42 | 0.28 |
| B | B62 | 0.17 | 0.34 | 0.09 | 0.36 | 0.04 |
| B | B63 | 0.09 | 0.29 | 0.35 | 0.12 | 0.15 |
| B | B64 | 0.07 | 0.21 | 0.32 | 0.15 | 0.25 |
| B | B65 | 0.17 | 0.09 | 0.23 | 0.3  | 0.21 |
| B | B66 | 0.32 | 0.23 | 0.16 | 0.11 | 0.18 |
| B | B67 | 0.13 | 0.16 | 0.32 | 0.24 | 0.15 |
| B | B68 | 0.26 | 0.24 | 0.2  | 0.07 | 0.23 |
| B | B69 | 0.12 | 0.22 | 0.25 | 0.24 | 0.17 |
| B | B70 | 0.16 | 0.11 | 0.33 | 0.05 | 0.35 |
| B | B71 | 0.22 | 0.01 | 0.4  | 0.23 | 0.14 |
| B | B72 | 0.32 | 0.01 | 0.32 | 0.14 | 0.21 |
| B | B73 | 0.28 | 0.28 | 0.03 | 0.19 | 0.22 |
| B | B74 | 0.17 | 0.26 | 0.12 | 0.18 | 0.27 |
| B | B75 | 0.03 | 0.22 | 0.31 | 0.22 | 0.22 |
| B | B76 | 0.33 | 0.07 | 0.28 | 0.25 | 0.07 |
| B | B77 | 0.25 | 0.09 | 0.17 | 0.27 | 0.22 |
| B | B78 | 0.23 | 0.1  | 0.21 | 0.26 | 0.2  |
| B | B79 | 0.26 | 0.2  | 0.25 | 0    | 0.29 |
| B | B80 | 0.08 | 0.3  | 0.01 | 0.45 | 0.16 |
| B | B81 | 0.36 | 0.17 | 0.04 | 0.27 | 0.16 |
| B | B82 | 0.29 | 0.35 | 0.19 | 0.13 | 0.04 |
| B | B83 | 0.1  | 0.26 | 0.23 | 0.32 | 0.09 |
| B | B84 | 0.09 | 0.34 | 0.17 | 0.24 | 0.16 |
| B | B85 | 0.14 | 0.28 | 0.18 | 0.07 | 0.33 |
| B | B86 | 0.28 | 0.24 | 0.03 | 0.14 | 0.31 |
| B | B87 | 0.19 | 0.26 | 0.14 | 0.25 | 0.16 |
| B | B88 | 0.08 | 0.26 | 0.32 | 0.27 | 0.07 |
| B | B89 | 0.5  | 0.2  | 0.01 | 0.23 | 0.06 |
| B | B90 | 0.02 | 0.26 | 0.31 | 0.17 | 0.24 |
| B | B91 | 0.27 | 0.09 | 0.19 | 0.27 | 0.18 |
| B | B92 | 0.1  | 0.24 | 0.26 | 0.25 | 0.15 |
| B | B93 | 0.2  | 0.3  | 0.07 | 0.1  | 0.33 |
| B | B94 | 0.1  | 0.24 | 0.22 | 0.2  | 0.24 |
| B | B95 | 0.23 | 0.29 | 0.22 | 0.03 | 0.23 |
| B | B96 | 0.19 | 0.21 | 0.18 | 0.31 | 0.11 |
| B | B97 | 0.2  | 0.15 | 0.15 | 0.23 | 0.27 |

|   |      |       |       |       |       |       |
|---|------|-------|-------|-------|-------|-------|
| B | B98  | 0.15  | 0.31  | 0.28  | 0.09  | 0.17  |
| B | B99  | 0.27  | 0.17  | 0.23  | 0.05  | 0.28  |
| B | B100 | 0.07  | 0.25  | 0.04  | 0.2   | 0.44  |
| C | C1   | 0.868 | 0.104 | 0.028 | 0.000 | 0.000 |
| C | C2   | 0.900 | 0.000 | 0.100 | 0.000 | 0.000 |
| C | C3   | 0.488 | 0.499 | 0.013 | 0.000 | 0.000 |
| C | C4   | 0.333 | 0.000 | 0.000 | 0.660 | 0.006 |
| C | C5   | 0.435 | 0.003 | 0.554 | 0.008 | 0.000 |
| C | C6   | 0.377 | 0.178 | 0.427 | 0.016 | 0.002 |
| C | C7   | 0.352 | 0.004 | 0.637 | 0.004 | 0.004 |
| C | C8   | 0.022 | 0.406 | 0.571 | 0.000 | 0.000 |
| C | C9   | 0.172 | 0.188 | 0.188 | 0.453 | 0.000 |
| C | C10  | 0.056 | 0.007 | 0.813 | 0.125 | 0.000 |
| C | C11  | 0.287 | 0.011 | 0.000 | 0.702 | 0.000 |
| C | C12  | 0.264 | 0.000 | 0.726 | 0.000 | 0.009 |
| C | C13  | 0.350 | 0.190 | 0.440 | 0.000 | 0.020 |
| C | C14  | 0.450 | 0.055 | 0.275 | 0.000 | 0.220 |
| C | C15  | 0.616 | 0.059 | 0.293 | 0.032 | 0.000 |

\*Set B simulated communities highlighted in blue are shown in Figure 1.
