# Supplementary material for: MG-MLST: Characterizing the Microbiome at the Strain Level in Metagenomic Data
Source: Microorganisms. 2020 May 8;8(5):684. doi: 10.3390/microorganisms8050684 (PMC7284976; doi:10.3390/microorganisms8050684)
Supplement: Supplementary file 1 [file microorganisms-08-00684-s001.zip › MLSTPaper-SupplementaryTableS3_final.pdf]

Table S3. Pearson's correlations of the *P. acnes* strain composition in each sample between different methods.

| Healthy                                | H01   | H02   | H03   | H04   | H05   | H06   | H07   | H08   | H09   | H10    | H11    | H12    | H13    |
|----------------------------------------|-------|-------|-------|-------|-------|-------|-------|-------|-------|--------|--------|--------|--------|
| Comparison to 16S Clone Library        |       |       |       |       |       |       |       |       |       |        |        |        |        |
| 16S                                    | 1.000 | 1.000 | 1.000 | 1.000 | 1.000 | 1.000 | 1.000 | 1.000 | 1.000 | 1.000  | 1.000  | 1.000  | 1.000  |
| Aarhus                                 | 0.983 | 0.985 | 0.994 | 0.993 | 0.992 | 0.791 | 0.666 | 0.483 | 0.292 | -0.069 | -0.278 | -0.312 | -0.510 |
| Belfast                                | 0.982 | 0.998 | 0.999 | 0.997 | 0.996 | 0.667 | 0.926 | 0.734 | 0.666 | -0.077 | -0.281 | -0.294 | 0.592  |
| Aarhus-Belfast                         | 0.992 | 0.988 | 0.997 | 0.997 | 0.998 | 0.608 | 0.950 | 0.974 | 0.989 | 0.999  | 0.999  | 0.999  | 0.410  |
| 454                                    | 0.996 | -     | -     | -     | -     | -     | 0.573 | -     | -     | -      | -      | -      | -      |
| Comparison to MG-MLST (Aarhus)         |       |       |       |       |       |       |       |       |       |        |        |        |        |
| 16S                                    | 0.983 | 0.985 | 0.994 | 0.993 | 0.992 | 0.791 | 0.666 | 0.483 | 0.292 | -0.069 | -0.278 | -0.312 | -0.510 |
| Aarhus                                 | 1.000 | 1.000 | 1.000 | 1.000 | 1.000 | 1.000 | 1.000 | 1.000 | 1.000 | 1.000  | 1.000  | 1.000  | 1.000  |
| Belfast                                | 0.997 | 0.975 | 0.996 | 0.995 | 0.989 | 0.937 | 0.813 | 0.530 | 0.146 | 0.008  | -0.234 | -0.263 | 0.246  |
| Aarhus-Belfast                         | 0.998 | 0.961 | 1.000 | 0.998 | 0.997 | 0.931 | 0.775 | 0.543 | 0.410 | -0.029 | -0.242 | -0.276 | 0.406  |
| 454                                    | 0.995 | -     | -     | -     | -     | -     | 0.986 | -     | -     | -      | -      | -      | -      |
| Comparison to MG-MLST (Belfast)        |       |       |       |       |       |       |       |       |       |        |        |        |        |
| 16S                                    | 0.982 | 0.998 | 0.999 | 0.997 | 0.996 | 0.667 | 0.926 | 0.734 | 0.666 | -0.077 | -0.281 | -0.294 | 0.592  |
| Aarhus                                 | 0.997 | 0.975 | 0.996 | 0.995 | 0.989 | 0.937 | 0.813 | 0.530 | 0.146 | 0.008  | -0.234 | -0.263 | 0.246  |
| Belfast                                | 1.000 | 1.000 | 1.000 | 1.000 | 1.000 | 1.000 | 1.000 | 1.000 | 1.000 | 1.000  | 1.000  | 1.000  | 1.000  |
| Aarhus-Belfast                         | 0.998 | 0.986 | 0.998 | 0.999 | 0.993 | 0.995 | 0.995 | 0.760 | 0.678 | -0.075 | -0.305 | -0.322 | 0.978  |
| 454                                    | 0.991 | -     | -     | -     | -     | -     | 0.758 | -     | -     | -      | -      | -      | -      |
| Comparison to MG-MLST (Aarhus-Belfast) |       |       |       |       |       |       |       |       |       |        |        |        |        |
| 16S                                    | 0.992 | 0.988 | 0.997 | 0.997 | 0.998 | 0.608 | 0.950 | 0.974 | 0.989 | 0.999  | 0.999  | 0.999  | 0.410  |
| Aarhus                                 | 0.998 | 0.961 | 1.000 | 0.998 | 0.997 | 0.931 | 0.775 | 0.543 | 0.410 | -0.029 | -0.242 | -0.276 | 0.406  |
| Belfast                                | 0.998 | 0.986 | 0.998 | 0.999 | 0.993 | 0.995 | 0.995 | 0.760 | 0.678 | -0.075 | -0.305 | -0.322 | 0.978  |
| Aarhus-Belfast                         | 1.000 | 1.000 | 1.000 | 1.000 | 1.000 | 1.000 | 1.000 | 1.000 | 1.000 | 1.000  | 1.000  | 1.000  | 1.000  |
| 454                                    | 0.998 | -     | -     | -     | -     | -     | 0.717 | -     | -     | -      | -      | -      | -      |
| Acne                                   |       |       |       |       |       |       |       |       |       |        |        |        |        |
| Acne                                   | A01   | A02   | A03   | A04   | A05   | A06   | A07   | A08   | A09   | A10    | A11    | A12    | A13    |
| Comparison to 16S Clone Library        |       |       |       |       |       |       |       |       |       |        |        |        |        |
| 16S                                    | 1.000 | 1.000 | 1.000 | 1.000 | 1.000 | 1.000 | 1.000 | 1.000 | 1.000 | 1.000  | 1.000  | 1.000  | 1.000  |
| Aarhus                                 | 0.999 | 0.999 | 0.997 | 0.999 | 0.986 | 0.979 | 0.964 | 0.961 | 0.937 | 0.745  | 0.740  | 0.055  | -0.185 |
| Belfast                                | 0.998 | 0.998 | 0.993 | 0.994 | 0.984 | 0.990 | 0.999 | 0.958 | 0.901 | 0.962  | 0.592  | 0.265  | -0.253 |
| Aarhus-Belfast                         | 1.000 | 0.999 | 0.997 | 1.000 | 0.998 | 0.998 | 0.991 | 0.962 | 0.920 | 0.962  | 0.713  | 0.240  | 0.706  |
| 454                                    | 1.000 | -     | 0.999 | -     | -     | -     | -     | -     | -     | 0.895  | -      | -      | -0.106 |
| Comparison to MG-MLST (Aarhus)         |       |       |       |       |       |       |       |       |       |        |        |        |        |
| 16S                                    | 0.999 | 0.999 | 0.997 | 0.999 | 0.986 | 0.979 | 0.964 | 0.961 | 0.937 | 0.745  | 0.740  | 0.055  | -0.185 |
| Aarhus                                 | 1.000 | 1.000 | 1.000 | 1.000 | 1.000 | 1.000 | 1.000 | 1.000 | 1.000 | 1.000  | 1.000  | 1.000  | 1.000  |
| Belfast                                | 0.994 | 1.000 | 0.988 | 0.989 | 0.981 | 0.975 | 0.973 | 0.975 | 0.780 | 0.555  | 0.920  | 0.937  | -0.293 |
| Aarhus-Belfast                         | 0.998 | 1.000 | 0.995 | 0.999 | 0.974 | 0.990 | 0.991 | 0.992 | 0.801 | 0.657  | 0.975  | 0.970  | 0.501  |
| 454                                    | 0.999 | -     | 0.999 | -     | -     | -     | -     | -     | -     | 0.897  | -      | -      | 0.826  |
| Comparison to MG-MLST (Belfast)        |       |       |       |       |       |       |       |       |       |        |        |        |        |
| 16S                                    | 0.998 | 0.998 | 0.993 | 0.994 | 0.984 | 0.990 | 0.999 | 0.958 | 0.901 | 0.962  | 0.592  | 0.265  | -0.253 |
| Aarhus                                 | 0.994 | 1.000 | 0.988 | 0.989 | 0.981 | 0.975 | 0.973 | 0.975 | 0.780 | 0.555  | 0.920  | 0.937  | -0.293 |
| Belfast                                | 1.000 | 1.000 | 1.000 | 1.000 | 1.000 | 1.000 | 1.000 | 1.000 | 1.000 | 1.000  | 1.000  | 1.000  | 1.000  |
| Aarhus-Belfast                         | 0.999 | 1.000 | 0.998 | 0.993 | 0.979 | 0.991 | 0.995 | 0.995 | 0.999 | 0.943  | 0.981  | 0.991  | -0.163 |
| 454                                    | 0.998 | -     | 0.994 | -     | -     | -     | -     | -     | -     | 0.802  | -      | -      | -0.139 |
| Comparison to MG-MLST (Aarhus-Belfast) |       |       |       |       |       |       |       |       |       |        |        |        |        |
| 16S                                    | 1.000 | 0.999 | 0.997 | 1.000 | 0.998 | 0.998 | 0.991 | 0.962 | 0.920 | 0.962  | 0.713  | 0.240  | 0.706  |
| Aarhus                                 | 0.998 | 1.000 | 0.995 | 0.999 | 0.974 | 0.990 | 0.991 | 0.992 | 0.801 | 0.657  | 0.975  | 0.970  | 0.501  |
| Belfast                                | 0.999 | 1.000 | 0.998 | 0.993 | 0.979 | 0.991 | 0.995 | 0.995 | 0.999 | 0.943  | 0.981  | 0.991  | -0.163 |
| Aarhus-Belfast                         | 1.000 | 1.000 | 1.000 | 1.000 | 1.000 | 1.000 | 1.000 | 1.000 | 1.000 | 1.000  | 1.000  | 1.000  | 1.000  |
| 454                                    | 1.000 | -     | 0.997 | -     | -     | -     | -     | -     | -     | 0.877  | -      | -      | 0.410  |
