# Supplementary material for: MG-MLST: Characterizing the Microbiome at the Strain Level in Metagenomic Data
Source: Microorganisms. 2020 May 8;8(5):684. doi: 10.3390/microorganisms8050684 (PMC7284976; doi:10.3390/microorganisms8050684)
Supplement: Supplementary file 1 [file microorganisms-08-00684-s001.zip › MLSTPaper-SupplementaryTableS4_final.pdf]

**Table S4. Marker SNPs for each allele of the MLST genes.**

| Allele   | Marker SNPs for the allele                                                                                                                                                                                                                                  |
|----------|-------------------------------------------------------------------------------------------------------------------------------------------------------------------------------------------------------------------------------------------------------------|
| fba 2    | RT1 (Default)                                                                                                                                                                                                                                               |
| fba 3    | C2137666A, A2137717G                                                                                                                                                                                                                                        |
| fba 4    | A2137717G                                                                                                                                                                                                                                                   |
| fba 5    | A2137717G, C2137780T                                                                                                                                                                                                                                        |
| fba 7    | A2137702G, A2137717G, G2137837A, G2137896A                                                                                                                                                                                                                  |
| fba 8    | A2137702G, A2137717G, G2137837A, G2137871A, G2137896A                                                                                                                                                                                                       |
| fba 9    | A2137702G, A2137717G, G2137759A, G2137837A, G2137896A                                                                                                                                                                                                       |
| lac 4    | RT1 (Default)                                                                                                                                                                                                                                               |
| lac 5    | T16011C                                                                                                                                                                                                                                                     |
| lac 7    | A15694G, C15765T, C15772A, T15904G, C15939T, A15964G, T16011C, G16042A                                                                                                                                                                                      |
| lac 9    | G16041T                                                                                                                                                                                                                                                     |
| lac 10   | A15694G, C15765T, C15772A, C15846G, T15904G, C15939T, A15964G, T16011C, G16042A                                                                                                                                                                             |
| recA 2   | C1280249T                                                                                                                                                                                                                                                   |
| recA 5   | RT1 (Default)                                                                                                                                                                                                                                               |
| recA 6   | A1280354G                                                                                                                                                                                                                                                   |
| recA 10* | C1280809T                                                                                                                                                                                                                                                   |
| zno 5    | C1207754T                                                                                                                                                                                                                                                   |
| zno 6    | RT1 (Default)                                                                                                                                                                                                                                               |
| zno 7    | G1207638T, C1207642T                                                                                                                                                                                                                                        |
| zno 9    | C1207624G, C1207642T                                                                                                                                                                                                                                        |
| zno 11   | C1207642T                                                                                                                                                                                                                                                   |
| zno 14   | G1207344A, C1207348T, A1207350G, G1207368A, A1207374T, C1207376T, C1207377T, G1207434C, A1207440G, T1207447C, C1207470G, A1207534G, A1207543G, T1207576C, T1207619C, C1207642T, T1207645G, C1207647T, A1207677G, A1207692G, C1207707T                       |
| zno 15   | C1207642T, G1207703C                                                                                                                                                                                                                                        |
| zno 16   | C1207642T, T1207683G                                                                                                                                                                                                                                        |
| zno 17*  | C1207348T, A1207374C, T1207404C, A1207440G, T1207447C, A1207479G, T1207506C, A1207534G, C1207538T, G1207563A, C1207572A, C1207573T, C1207580T, A1207605G, T1207619C, C1207623T, G1207635A, C1207642T, T1207645G, A1207677G, T1207686C, A1207692G, G1207693A |
| aroE 1   | RT1 (Default)                                                                                                                                                                                                                                               |
| aroE 5   | G1087614A                                                                                                                                                                                                                                                   |
| aroE 8*  | G1087713A                                                                                                                                                                                                                                                   |
| aroE 9*  | G1087374A, T1087421C, C1087589T, G1087595A, G1087614A, G1087703A                                                                                                                                                                                            |
| aroE 15  | T1087319C, C1087329T, T1087349C, T1087357C, G1087391A, A1087394G, A1087397G, C1087398T, A1087415G, T1087421C, T1087432C, C1087448T, G1087467A, C1087477T, G1087490C, C1087529T, C1087546T, A1087550C, G1087565A, C1087620T                                  |
| aroE 16* | C1087687T                                                                                                                                                                                                                                                   |
| aroE 17  | T1087319C, C1087329T, T1087349C, T1087357C, G1087391A, A1087394G, A1087397G, C1087398T, A1087415G, T1087421C, T1087432C, C1087448T, G1087467A, C1087477T, G1087490C, C1087529T, C1087546T, A1087550C, G1087565A                                             |
| camp2 1  | RT1 (Default)                                                                                                                                                                                                                                               |
| camp2 2  | A1603253C, T1603319A, G1603349A, C1603414T                                                                                                                                                                                                                  |
| camp2 4  | G1602992T, A1603253C, T1603319A, G1603349A, C1603414T                                                                                                                                                                                                       |
| camp2 5* | A1603253C, T1603319A, G1603349A, C1603414T, T1603441C                                                                                                                                                                                                       |
| camp2 6  | A1603253C                                                                                                                                                                                                                                                   |
| camp2 7  | T1603047C, A1603253C, T1603319A, G1603349A, C1603414T                                                                                                                                                                                                       |
| camp2 8  | T1603047C, A1603253C, T1603319A, G1603349A, C1603414T, G1603472C                                                                                                                                                                                            |
| camp2 9  | A1603253C, T1603319A, G1603349A, C1603414T, C1603604T                                                                                                                                                                                                       |

|           |                                                                                                                                                                                                                                                                                   |
|-----------|-----------------------------------------------------------------------------------------------------------------------------------------------------------------------------------------------------------------------------------------------------------------------------------|
| camp2 10  | C1602880T, A1602904G, G1602990A, C1602994A, C1603006T, C1603009G, A1603026G, G1603119A, T1603138C, C1603141T, T1603168G, A1603208G, C1603231G, A1603253C, G1603384A, T1603441C, G1603447A, A1603466G, G1603528C, A1603556G, A1603573C, T1603579C, C1603627T, C1603630T, C1603636T |
| camp2 12  | C1602880T, A1602904G, G1602990A, C1602994A, C1603006T, C1603009G, A1603026G, T1603138C, C1603141T, T1603168G, A1603208G, C1603231G, A1603253C, G1603384A, T1603441C, G1603447A, A1603466G, G1603528C, A1603556G, A1603573C, T1603579C, C1603627T, C1603630T, C1603636T            |
| camp2 13  | C1602880T, A1602904G, G1602990A, C1602994A, C1603006T, C1603009G, A1603026G, T1603138C, C1603141T, G1603163A, T1603168G, A1603208G, C1603231G, A1603253C, G1603384A, T1603441C, G1603447A, A1603466G, G1603528C, A1603556G, A1603573C, T1603579C, C1603627T, C1603630T, C1603636T |
| camp2 14* | A1603253C, A1603315C                                                                                                                                                                                                                                                              |
| guaA 1    | T1879647C                                                                                                                                                                                                                                                                         |
| guaA 3    | RT1 (Default)                                                                                                                                                                                                                                                                     |
| guaA 4    | G1879467A, A1879485G, G1879554A, G1879569A, C1879575G, A1879599T, A1879623G, A1879638G, G1879677A, G1879701A, A1879719G, A1879722G, A1879728G, G1879740A, G1879761A, A1879779G, A1879818G, C1879926T                                                                              |
| guaA 5    | C1879553A                                                                                                                                                                                                                                                                         |
| guaA 8*   | G1879545A, A1879595G, T1879636C, G1879902A                                                                                                                                                                                                                                        |
| guaA 13   | G1879467A, C1879553A                                                                                                                                                                                                                                                              |
| guaA 15*  | G1879558A                                                                                                                                                                                                                                                                         |
| guaA 16   | G1879467A, A1879485G, G1879551A, G1879554A, G1879569A, C1879575G, A1879599T, A1879623G, A1879638G, G1879677A, G1879701A, A1879719G, A1879722G, A1879728G, G1879740A, G1879761A, A1879779G, A1879818G, C1879926T                                                                   |
| tly 1     | RT1 (Default)                                                                                                                                                                                                                                                                     |
| tly 2     | C885651T, T886334G                                                                                                                                                                                                                                                                |
| tly 3     | T885868C                                                                                                                                                                                                                                                                          |
| tly 4     | C885877T                                                                                                                                                                                                                                                                          |
| tly 5     | C885651T, T885884G, G885901T, T886334G                                                                                                                                                                                                                                            |
| tly 6     | C885886T, A885887T, A885891C, T885894C, T885897G                                                                                                                                                                                                                                  |
| tly 8     | T885943C, T886334G                                                                                                                                                                                                                                                                |
| tly 9     | A885891C, T885943C, T886334G                                                                                                                                                                                                                                                      |
| tly 10    | C885602T, G885606A, T885646C, T885673C, A885745G, T885751C, G885755A, C885769T, G885798C, A885799T, G885856A, C885880T, T885943C, G885959A, A886024G, G886046A, G886114T, C886148T, G886216T, T886334G, C886350A                                                                  |
| tly 14*   | A885745G, T885943C, T886334G                                                                                                                                                                                                                                                      |

Alleles marked with an asterisk (\*) are only considered and included when using the combined Aarhus-Belfast scheme, where strains with these alleles are included in the "Learning Sample" set.
